# Supplementary material for: ‘We do not seem to engage with dentists’: a qualitative study of primary healthcare staff and patients in the North East of England on the role of pharmacists in oral healthcare
Source: PubMed Central journal article supplement — BMJ Open. 2020 Feb 28;10(2):e032261. doi: 10.1136/bmjopen-2019-032261 (PMC7050309; doi:10.1136/bmjopen-2019-032261), 2020-02-28
Supplement: bmjopen-2019-032261supp004.pdf [file bmjopen-2019-032261supp004.pdf]

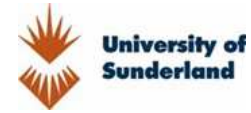

## Participant Information Sheet

### Study title:

An explorative study into the feasibility of oral health promotion and interventions by pharmacists working in general practice. A qualitative study in the North East of England.

### What is the purpose of this study?

This study is looking to explore the current practices and feasibility of primary care pharmacists providing oral health promotion and interventions in a general practice setting.

### Who can take part?

This study requires participants from five different groups;

1. General Practice Pharmacists, registered with the General Pharmaceutical Council
2. General Medical Practitioners, registered with the General Medical Council
3. General Practice Administrative Staff – Practice Managers at General Medical Practices
4. General Practice Nurses, registered with the Nursing & Midwifery Council
5. Patients, recruited from the University Patient Carer Public Involvement Group

### Do I have to take part and can I change my mind?

Participation is entirely voluntary. If you change your mind about taking part in the study, you can withdraw at any point during the session without giving a reason and without penalty. Once the anonymised transcripts have been produced you will not be able to withdraw from the study. After the interview has been completed audio recording will be transcribed within 7 days.

### What will happen to me if I take part?

We would like your help with this study by asking you to talk to one of our team members for up to an hour. We will audio record this conversation so that it is easier for us to make notes later about what was said. The interview can take place in person or via telephone, at your place of work, at the University of Sunderland, or we can come to your home to talk to you. The researcher will ask you a series of questions in relation to the study title and your experiences in practice, from which there are absolutely no right or wrong answers. Your answers may lead to further discussion around any point or topics raised.

### What are the possible disadvantages and risks of taking part?

We don't think that there are any risks associated with taking part in this study.

### What if something goes wrong?

If you change your mind about participation, please contact me by email to cancel your participation. If you feel unhappy about the conduct of the study, please contact me immediately or the Chairperson of the University of Sunderland Research Ethics Group, whose contact details are given below.

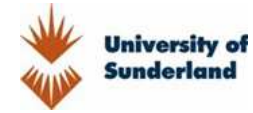

## Participant Information Sheet

### Will my taking part in this study be kept confidential?

The University of Sunderland is the sponsor for this study based in the United Kingdom. We will be using information from you in order to undertake this study and will act as the data controller for this study. This means that we are responsible for looking after your information and using it properly. The University of Sunderland will keep identifiable information about you; a list of participants and signed consent forms will be stored securely by the principle investigator for a period of up to 2 years. Audio recordings and transcripts will be stored securely by the principle investigator for a period of up to 6 years. Access will be restricted to the research team and persons authorised by the University for Quality Assurance purposes.

Participation in this study will be kept confidential. No personally identifiable information will be included in any write up or publication; a non-identifiable participant code will be used against any quotes provided, the first participant will be given the code P1, the numerical value will change with each subsequent participant e.g. P2, P3 etc.

Your rights to access, change or move your information are limited, as we need to manage your information in specific ways in order for the research to be reliable and accurate. If you withdraw from the study, we will keep the information about you that we have already obtained. To safeguard your rights, we will use the minimum personally-identifiable information possible.

You can find out more about how we use your information by contacting the Principal Investigator, Andrew Sturrock [andrew.sturrock@sunderland.ac.uk](mailto:andrew.sturrock@sunderland.ac.uk) or Dr John Fulton, Chair of the University of Sunderland Research Ethics Group [john.fulton@sunderland.ac.uk](mailto:john.fulton@sunderland.ac.uk).

### What will happen to the results of this study?

If suitable, the results may be presented at academic conferences and/or written up for publication in peer reviewed academic journals. A summary of the results will be made available to participants if you choose to receive a copy.

### Who is organising and funding the research?

The research is being done by a research team at the University of Sunderland. The Chief Investigator for the project is Andrew Sturrock. His title is 'Principal Lecturer' and he is based in the School of Pharmacy and Pharmaceutical Sciences.

This project has received no external funding.

### Who has reviewed the study?

The University of Sunderland Research Ethics Group has reviewed and approved the study.

Contact for further information:

Doctor John Fulton (Chair of the University of Sunderland Research Ethics Group, University of Sunderland) Email: [john.fulton@sunderland.ac.uk](mailto:john.fulton@sunderland.ac.uk) Phone: 0191 515 2529

### Who can I contact if I have questions about the study?

If you have any questions, we would like you to get in touch with us. You can do this by telephoning us on 0191 5152448

Version 2 – 28/03/2019

iRAS Ref - 255400

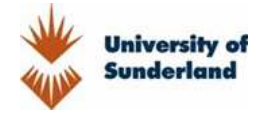

## Participant Information Sheet

or you can email us on [andrew.sturrock@sunderland.ac.uk](mailto:andrew.sturrock@sunderland.ac.uk)

### What should I do if I want to take part?

If you don't have any questions and would like to take part, please can you fill in the **Response Form** and send it to us. Please let us know the best way for us to get in touch with you. We don't know how many practitioners will want to help us so we might find we have too many and we may not need to ask for your help. Once we have your form, someone from the research team will get in touch with you and let you know if we do need your help or not. If we do they will arrange the best time and place for you to meet and talk to us.

Thank you for taking the time to read this information.
