# Supplementary material for: ‘We do not seem to engage with dentists’: a qualitative study of primary healthcare staff and patients in the North East of England on the role of pharmacists in oral healthcare
Source: PubMed Central journal article supplement — BMJ Open. 2020 Feb 28;10(2):e032261. doi: 10.1136/bmjopen-2019-032261 (PMC7050309; doi:10.1136/bmjopen-2019-032261), 2020-02-28
Supplement: bmjopen-2019-032261supp005.pdf [file bmjopen-2019-032261supp005.pdf]

### Coding Tree

#### **Enhanced clinical roles**

- Accessibility to other primary care staff
- An evolving and advancing role
- Increased responsibility and accountability
- Chronic disease and medication management
- Management of high-risk medications
- Interface between care settings
- Lifestyle advice
- Access by patients

#### **Limited knowledge**

- Basic understanding
- Signposting to dental services
- Duty of care
- Limited links to systemic health
- Role in deprescribing
- Patient safety alerts – actioned but often forgotten
- Patient knowledge gained from dentists or parents
- A willingness for more education

#### **Geographical/situational isolation**

- Limited collaboration/communication
- No formal pathways
- Lack of shared records
- Reluctance/barriers for patient engagement with dental services
- Stereotyped professional roles

#### **Integration of oral health advice**

- Ability to identify and access patients
- Provision of lifestyle advice
- Less time pressures
- Need for direction/services
